# Supplementary material
Source: ML conference proceedings conference paper supplement (https://openreview.net/forum?id=G2kMroO9UV)
Supplement: supplementary_material [file 32102e3e-d12a-4209-9163-7b3a104efe5d.xlsx]

## Sheet: Sheet1
Flop Video Rental Store	1001 Rewind Drive, Seattle WA
Title	Genre	Year	Platform	Status
DVD
Time-Parking 2: Parallel Universe	Science Fiction	2009		Available
Breathtaking: The Keanu Reeves Story	Biopic	2023		Rented
The Widest Goalpost	Sports	2021		Overdue
Cereal Killer IV: No Milk	Horror	2012		Missing
Shiny Vampire Car Chase	Action	2013		Missing
People Hanging Out Together	Comedy	2020		Missing
Blu-Ray
Time-Parking 2: Parallel Universe	Science Fiction	2009		Missing
Cereal Killer III: Incomplete Breakfast	Horror	2011		Rented
Windshield Bug: The First Ten Seasons	Comedy	2016		Rented
A Protist's Life	Documentary	2018		Available
My Neighbor Is A Shrimp Farmer	Anime	2022		Available
Dogs and Croatia: A Movie About Both These Things	Adventure	2023		Overdue
Video Games
First-Person Scooter	Racing	2019	Nintendo Switch	Missing
The Locked Door	RPG	2021	Playstation 5	Available
Shopping Cart Raceway	Racing	2005	Nintendo Gamecube	Rented
No Lights	Horror	2004	Xbox	Overdue
Eraser Simulator	Simulation	2018	Nintendo Switch	Available
Gilbert Gopher Goes to Greece	Platformer	1995	Super Nintendo	Rented
Skirmish	Fighting	2008	Xbox 360	Available
Cool: The Game	Platformer	1994	Sega Genesis	Overdue
Dinosaur Accountant	Simulation	1989	Nintendo Entertainment System	Available
Four Controllers	Party	2009	Nintendo Wii	Overdue
